# Supplementary material for: Self-assembly synthesis of hollow phosphorus-doped graphitic carbon nitride microboxes for the photodegradation of organic pollutants
Source: Royal Society of Chemistry journal article supplement (doi:10.1039/d3cp04262f), 2023-01-01
Supplement: d3cp04262f1.pdf [file d3cp04262f1.pdf]

Electronic Supplementary Material (ESI) for ChemComm.  
This journal is © The Royal Society of Chemistry 2023

---

Electronic Supplementary Information

**Self-assembly synthesis of hollow phosphorus-doped  
graphitic carbon nitride microboxes for the  
photodegradation of organic pollutants**

Si Cheng,<sup>a</sup> Lifeng Miao,<sup>\*a</sup> Kunze Xue,<sup>b</sup> Zhenhong Bao,<sup>a</sup> Jian Liang,<sup>a</sup> Xiaohong Li,<sup>a</sup>  
Wenjun Zhu,<sup>c</sup> Yunxia Chen,<sup>\*a</sup> Yongzhi Yu<sup>\*a</sup>

<sup>a</sup>National Engineering Research Center for Domestic & Building Ceramics, Jingdezhen Ceramic University, Jingdezhen 333001, PR China.

E-mail: yuyongzhi1120@126.com (Yongzhi Yu), mlf0624@163.com (Lifeng Miao),  
chenyunxia@jcu.edu.cn

<sup>b</sup>Hefei National Research Center for Physical Sciences at the Microscale, Department of Chemistry, University of Science and Technology of China, Hefei 230026, China.

<sup>c</sup>School of Mechanical and Electronic Engineering, Jingdezhen Ceramic University, Jingdezhen 333403, PR China

## 1. Orthogonal experimental design

**Table S1** factor level.

| Level | Factor |         |        |         |        |
|-------|--------|---------|--------|---------|--------|
|       | A (MR) | B (CPA) | C (HT) | D (HTi) | E (CT) |
| 1     | 1:1    | 0.25    | 120    | 6       | 490    |
| 2     | 3:1    | 0.5     | 140    | 9       | 520    |
| 3     | 6:1    | 1       | 160    | 12      | 550    |
| 4     | 9:1    | 1.5     | 180    | 15      | 580    |
| 5     | 12:1   | 2       | 200    | 18      | 610    |

**Table S2** Orthogonal experimental program ( $L_{25}(5^5)$ ) and corresponding kinetic rate constants ( $k$ ).

| Samples | MR   | CPA (mol/L) | HT (°C) | HTi (h) | CT (°C) | $k$ (min <sup>-1</sup> ) |
|---------|------|-------------|---------|---------|---------|--------------------------|
| PCN-1   | 1:1  | 0.25        | 120     | 6       | 490     | 0.4925                   |
| PCN-2   | 1:1  | 0.5         | 140     | 9       | 520     | 0.3488                   |
| PCN-3   | 1:1  | 1           | 160     | 12      | 550     | 0.8373                   |
| PCN-4   | 1:1  | 1.5         | 180     | 15      | 580     | 2.7141                   |
| PCN-5   | 1:1  | 2           | 200     | 18      | 610     | –                        |
| PCN-6   | 3:1  | 0.25        | 140     | 12      | 580     | 0.6119                   |
| PCN-6   | 3:1  | 0.5         | 160     | 15      | 610     | 1.3576                   |
| PCN-8   | 3:1  | 1           | 180     | 18      | 490     | 0.5926                   |
| PCN-9   | 3:1  | 1.5         | 200     | 6       | 520     | 0.4418                   |
| PCN-10  | 3:1  | 2           | 120     | 9       | 550     | 0.5587                   |
| PCN-11  | 6:1  | 0.25        | 160     | 18      | 520     | 0.5564                   |
| PCN-12  | 6:1  | 0.5         | 180     | 6       | 550     | 0.7003                   |
| PCN-13  | 6:1  | 1           | 200     | 9       | 580     | 2.7086                   |
| PCN-14  | 6:1  | 1.5         | 120     | 12      | 610     | 0.0015                   |
| PCN-15  | 6:1  | 2           | 140     | 15      | 490     | 0.3159                   |
| PCN-16  | 9:1  | 0.25        | 180     | 9       | 610     | –                        |
| PCN-17  | 9:1  | 0.5         | 200     | 12      | 490     | 0.3018                   |
| PCN-18  | 9:1  | 1           | 120     | 15      | 520     | 0.0232                   |
| PCN-19  | 9:1  | 1.5         | 140     | 18      | 550     | 0.6153                   |
| PCN-20  | 9:1  | 2           | 160     | 6       | 580     | 2.0518                   |
| PCN-21  | 12:1 | 0.25        | 200     | 15      | 550     | 0.3738                   |
| PCN-22  | 12:1 | 0.5         | 120     | 18      | 580     | 0.0231                   |
| PCN-23  | 12:1 | 1           | 140     | 6       | 610     | 0.0015                   |
| PCN-24  | 12:1 | 1.5         | 160     | 9       | 490     | 0.3749                   |
| PCN-25  | 12:1 | 2           | 180     | 12      | 520     | 1.1534                   |

## 2. Results of Characterizations

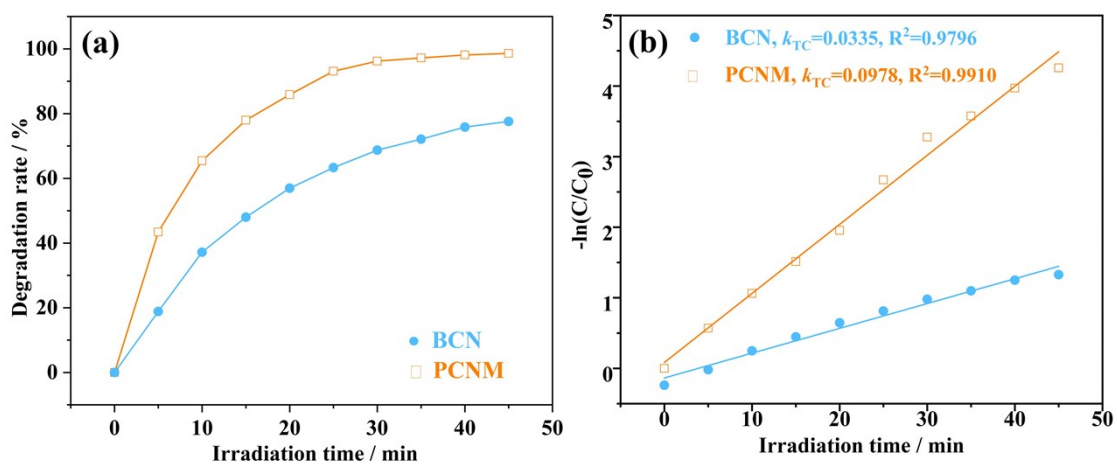

**Fig. S1** (a) The photocatalytic activities and (b) kinetic rate constants of PCNM and BCN for degradation TC.
